# Supplementary material for: Significant Biotransformation of Arsenobetaine into Inorganic Arsenic in Mice
Source: MDPI journal article supplement (doi:10.3390/toxics11020091), 2023-01-18
Supplement: s1 [file s1]

# **Significant biotransformation of arsenobetaine into inorganic arsenic in mice**

Jichao Zhang<sup>1</sup>, Zijun Ye<sup>1</sup>, Liping Huang<sup>1</sup>, Qianyu Zhao<sup>1</sup>, Kaige Dong<sup>1</sup>, Wei Zhang<sup>1\*</sup>

*<sup>1</sup> School of Environmental Science and Engineering, Guangzhou University,  
Guangzhou 510006, China*

\*Corresponding author, Email: zh\_wei@gzhu.edu.cn

## List of tables

**Figure S1.** Chromatogram of AsB in Pearl gentian grouper feed. A represents the arsenic solution extracted by homogenizer and 50% methanol solution as extractant, B represents the arsenic solution microwave-assisted by microwave digestion system and 1% HNO<sub>3</sub> as extractant.....S1

**Table S1.** Total As concentrations (μg/g) in stomach, intestine, heart, liver, spleen, lung, kidney, and muscle after As(III) diet, As(V) diet, Fish diet (YJ), Fish diet (ZJ), and Vehicle diet exposure. Data as mean±SD (n=10).....S2

**Table S2.** Total As, As species concentrations (μg/g) and distribution (%) in As(III) diet, As(V) diet, Fish diet (YJ), Fish diet (ZJ), and Vehicle diet. Data as mean±SD (n=10).....S3

**Figure S1**

**Figure S1.** Chromatogram of AsB in Pearl gentian grouper feed. A represents the arsenic solution extracted by homogenizer and 50% methanol solution as extractant, B represents the arsenic solution microwave-assisted by microwave digestion system and 1% HNO<sub>3</sub> as extractant.

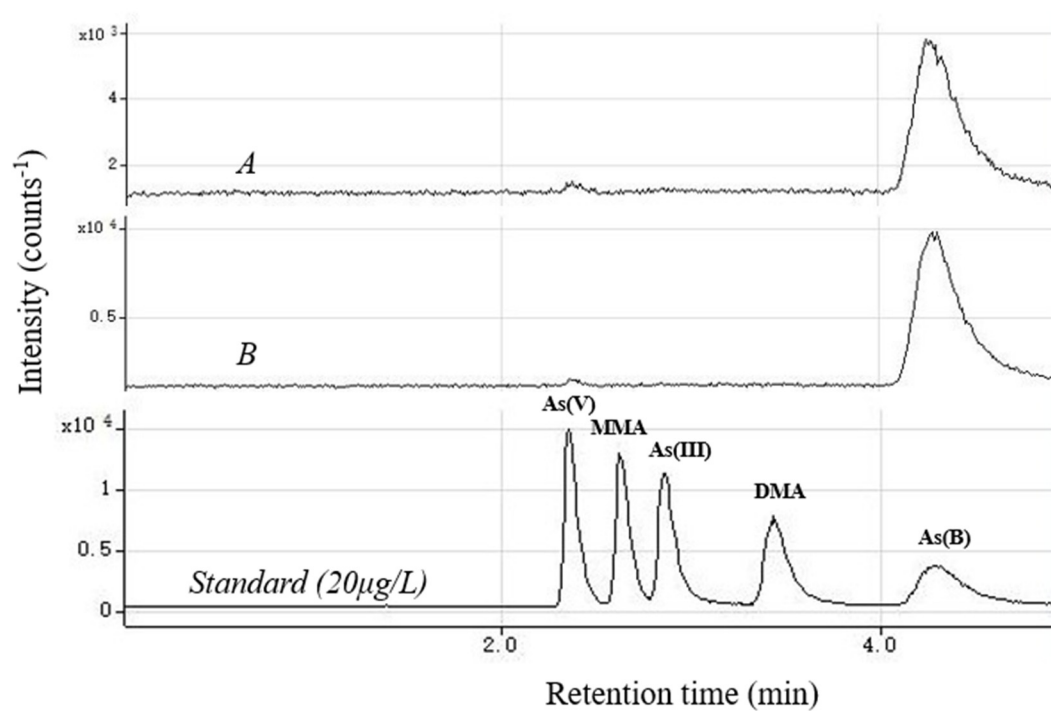

**Table S1** Total As and As species concentrations ( $\mu\text{g/g}$ ) in different tissues of mice. Below detection limit (BDL). Data as mean  $\pm$  SD (n=10).

| Treatment           | Tissues   | Arsenic species concentrations ( $\mu\text{g/g}$ ) and distribution (%) in tissues of mice |                                                  |                                               |                                              |                                              | Total As<br>(ICP-MS) extract | Column<br>recovery (%) |
|---------------------|-----------|--------------------------------------------------------------------------------------------|--------------------------------------------------|-----------------------------------------------|----------------------------------------------|----------------------------------------------|------------------------------|------------------------|
|                     |           | As(III)                                                                                    | As(V)                                            | MMA                                           | DMA                                          | AsB                                          |                              |                        |
| Control             | Stomach   | 0.00450 $\pm$ 0.000424<br>(55.5 $\pm$ 2.33)                                                | 0.000200 $\pm$ 0.0000100<br>(2.47 $\pm$ 0.00125) | 0.00175 $\pm$ 0.000710<br>(21.7 $\pm$ 2.01)   | 0.00165 $\pm$ 0.000710<br>(20.4 $\pm$ 0.190) | BDL                                          | 0.00675 $\pm$ 0.00167        | 120                    |
|                     | Intestine | 0.00287 $\pm$ 0.000777<br>(35.3 $\pm$ 13.7)                                                | 0.00230 $\pm$ 0.00200<br>(24.9 $\pm$ 17.2)       | 0.00137 $\pm$ 0.000252<br>(16.0 $\pm$ 0.901)  | 0.00200 $\pm$ 0.000100<br>(23.9 $\pm$ 3.22)  | BDL                                          | 0.00832 $\pm$ 0.00151        | 102                    |
|                     | Heart     | 0.000100 $\pm$ 0.00001<br>23<br>(8.28 $\pm$ 0.0145)                                        | 0.000667 $\pm$ 0.000208<br>(54.3 $\pm$ 13.8)     | 0.000300 $\pm$ 0.000100<br>(24.1 $\pm$ 5.85)  | 0.000167 $\pm$ 0.000115<br>(13.4 $\pm$ 8.50) | BDL                                          | 0.00113 $\pm$ 0.000191       | 109                    |
|                     | Liver     | 0.000958 $\pm$ 0.00045<br>0<br>(23.0 $\pm$ 9.05)                                           | 0.00107 $\pm$ 0.000567<br>(26.3 $\pm$ 11.7)      | 0.000740 $\pm$ 0.000241<br>(18.0 $\pm$ 3.44)  | 0.000620 $\pm$ 0.000179<br>(15.1 $\pm$ 1.50) | 0.000680 $\pm$ 0.000148<br>(17.6 $\pm$ 5.67) | 0.00396 $\pm$ 0.00109        | 103                    |
|                     | Lung      | 0.00157 $\pm$ 0.000519<br>(34.4 $\pm$ 9.16)                                                | 0.000700 $\pm$ 0.000141<br>(15.6 $\pm$ 4.19)     | 0.00115 $\pm$ 0.0000710<br>(25.5 $\pm$ 0.167) | 0.00110 $\pm$ 0.000141<br>(24.5 $\pm$ 4.80)  | BDL                                          | 0.00424 $\pm$ 0.000293       | 107                    |
|                     | Kidney    | 0.000300 $\pm$ 0.00001<br>00<br>(8.86 $\pm$ 0.00347)                                       | 0.00220 $\pm$ 0.00125<br>(56.7 $\pm$ 11.1)       | 0.000700 $\pm$ 0.000100<br>(20.0 $\pm$ 4.34)  | 0.000500 $\pm$ 0.000100<br>(14.4 $\pm$ 4.24) | BDL                                          | 0.00355 $\pm$ 0.00130        | 104                    |
|                     | Muscle    | 0.00117 $\pm$ 0.000376<br>(39.5 $\pm$ 8.35)                                                | 0.000250 $\pm$ 0.000178<br>(9.05 $\pm$ 4.67)     | 0.000650 $\pm$ 0.000127<br>(22.6 $\pm$ 5.17)  | 0.000840 $\pm$ 0.000158<br>(28.9 $\pm$ 3.46) | BDL                                          | 0.00271 $\pm$ 0.000514       | 107                    |
| As(III)<br>exposure | Stomach   | 0.240 $\pm$ 0.00270<br>(68.5 $\pm$ 0.544)                                                  | 0.0121 $\pm$ 0.000743<br>(3.50 $\pm$ 0.579)      | BDL                                           | 0.0981 $\pm$ 0.0104<br>(28.0 $\pm$ 0.0358)   | BDL                                          | 0.338 $\pm$ 0.0448           | 104                    |
|                     | Intestine | 0.239 $\pm$ 0.0487<br>(64.1 $\pm$ 2.73)                                                    | 0.0147 $\pm$ 0.00283<br>(3.99 $\pm$ 0.880)       | 0.0118 $\pm$ 0.00116<br>(3.28 $\pm$ 0.740)    | 0.106 $\pm$ 0.0138<br>(28.7 $\pm$ 2.45)      | BDL                                          | 0.377 $\pm$ 0.0687           | 98.6                   |
|                     | Heart     | 0.00650 $\pm$ 0.000707<br>(7.93 $\pm$ 1.64)                                                | 0.0648 $\pm$ 0.00679<br>(78.2 $\pm$ 0.448)       | BDL                                           | 0.0115 $\pm$ 0.00212<br>(13.8 $\pm$ 1.19)    | BDL                                          | 0.0824 $\pm$ 0.00981         | 100                    |

|                          |           |                                  |                                |                               |                               |                               |                  |      |
|--------------------------|-----------|----------------------------------|--------------------------------|-------------------------------|-------------------------------|-------------------------------|------------------|------|
|                          | Liver     | 0.0940±0.0110<br>(55.7±1.61)     | 0.0163±0.00769<br>(9.47±3.88)  | BDL                           | 0.0317±0.00519<br>(18.9±3.08) | 0.0268±0.00212<br>(16.0±2.13) | 0.0936±0.0119    | 180  |
|                          | Lung      | 0.0470±0.00990<br>(35.7±0.470)   | 0.0426±0.00481<br>(32.7±2.80)  | BDL                           | 0.0420±0.0113<br>(31.7±2.33)  | BDL                           | 0.130±0.0253     | 101  |
|                          | Kidney    | 0.0398±0.00854<br>(47.7±5.55)    | 0.0140±0.00285<br>(17.2±4.53)  | 0.0123±0.00126<br>(15.0±2.62) | 0.0168±0.00403<br>(20.1±3.81) | BDL                           | 0.0768±0.00317   | 108  |
|                          | Muscle    | 0.0461±0.00646<br>(66.2±7.34)    | 0.00600±0.00283<br>(8.77±4.34) | BDL                           | 0.0181±0.00911<br>(25.1±9.75) | BDL                           | 0.0667±0.0124    | 105  |
| As(V)<br>exposure        | Stomach   | 0.00450±0.00212<br>13.1±3.30     | 0.0225±0.00212<br>68.3±9.52    | BDL                           | 0.00200±0.00141<br>5.63±2.91  | 0.00450±0.00212<br>13.1±3.30  | 0.0330±0.00762   | 102  |
|                          | Intestine | 0.00650±0.00129<br>19.3±1.87     | 0.0178±0.00386<br>52.7±7.47    | BDL                           | 0.00450±0.000577<br>13.7±3.16 | 0.00475±0.00189<br>14.4±5.97  | 0.0332±0.00407   | 101  |
|                          | Heart     | 0.00250±0.000577<br>17.6±6.55    | 0.0125±0.00379<br>82.4±6.55    | BDL                           | BDL                           | BDL                           | 0.0150±0.00331   | 100  |
|                          | Liver     | 0.00586±0.000900<br>46.1±2.82    | 0.00214±0.000690<br>16.7±3.97  | BDL                           | 0.00114±0.000378<br>9.04±2.56 | 0.00357±0.000787<br>11.4±6.90 | 0.0139±0.00342   | 91.4 |
|                          | Lung      | 0.00500±0.000100<br>16.4±0.00102 | 0.0205±0.00212<br>67.1±2.29    | BDL                           | 0.00300±0.00141<br>9.78±4.41  | 0.00200±0.00141<br>6.51±4.49  | 0.0287±0.0000798 | 106  |
|                          | Kidney    | 0.00350±0.00100<br>14.1±1.67     | 0.0218±0.00732<br>85.9±1.67    | BDL                           | BDL                           | BDL                           | 0.0251±0.00806   | 101  |
|                          | Muscle    | 0.00233±0.000577<br>12.9±1.97    | 0.0100±0.00173<br>56.0±10.8    | BDL                           | 0.00267±0.00115<br>14.5±4.78  | 0.00300±0.00100<br>16.6±4.81  | 0.0202±0.00348   | 89.1 |
| Fish<br>exposure<br>(YJ) | Stomach   | 0.0290±0.00849<br>17.1±0.293     | 0.0400±0.00566<br>24.1±3.32    | BDL                           | 0.0115±0.00495<br>6.65±1.09   | 0.0885±0.0276<br>52.1±1.93    | 0.125±0.0559     | 135  |
|                          | Intestine | 0.0194±0.00295<br>7.73±1.41      | 0.0532±0.00813<br>21.1±2.69    | BDL                           | 0.00577±0.00209<br>2.25±0.620 | 0.176±0.0337<br>68.9±3.49     | 0.242±0.0323     | 105  |

|                          |           |                              |                              |     |                                |                              |                |      |
|--------------------------|-----------|------------------------------|------------------------------|-----|--------------------------------|------------------------------|----------------|------|
|                          | Heart     | 0.00900±0.00300<br>11.5±3.71 | 0.0213±0.00586<br>26.9±1.70  | BDL | 0.00500±0.00100<br>6.36±0.27   | 0.0437±0.0110<br>55.2±2.24   | 0.0673±0.0277  | 117  |
|                          | Liver     | 0.0227±0.00409<br>7.39±1.18  | 0.0511±0.00562<br>16.7±1.81  | BDL | 0.00425±0.000957<br>1.38±0.282 | 0.228±0.0168<br>74.5±3.15    | 0.237±0.0549   | 129  |
|                          | Lung      | 0.0142±0.001702<br>5.94±1.99 | 0.0405±0.00357<br>16.5±2.20  | BDL | 0.0152±0.00248<br>6.18±0.360   | 0.178±0.0503<br>71.4±4.55    | 0.251±0.0482   | 98.8 |
|                          | Kidney    | 0.0143±0.00403<br>7.60±0.550 | 0.0297±0.0143<br>15.5±3.76   | BDL | 0.00814±0.00192<br>4.39±0.424  | 0.134±0.0201<br>72.6±4.36    | 0.181±0.0371   | 103  |
|                          | Muscle    | 0.00787±0.00222<br>11.0±1.55 | 0.0133±0.00377<br>18.6±2.69  | BDL | 0.00805±0.00165<br>11.6±2.47   | 0.0414±0.00653<br>58.9±2.11  | 0.0725±0.0155  | 97.4 |
| Fish<br>exposure<br>(ZJ) | Stomach   | 0.0183±0.00327<br>16.1±4.34  | 0.0396±0.00764<br>34.2±3.42  | BDL | 0.0219±0.00157<br>19.0±0.422   | 0.0355±0.00487<br>30.8±1.34  | 0.0976±0.0415  | 118  |
|                          | Intestine | 0.0195±0.00683<br>11.2±2.00  | 0.0360±0.00983<br>21.1±5.51  | BDL | 0.0207±0.00390<br>12.1±1.63    | 0.0945±0.0130<br>55.6±5.55   | 0.172±0.0223   | 99.2 |
|                          | Heart     | 0.0144±0.000635<br>17.8±1.28 | 0.0320±0.00283<br>39.2±1.09  | BDL | 0.0143±0.00329<br>17.3±1.90    | 0.0210±0.00283<br>25.7±0.481 | 0.0794±0.0126  | 103  |
|                          | Liver     | 0.0157±0.00308<br>7.60±2.58  | 0.0316±0.0107<br>14.4±3.46   | BDL | 0.0144±0.00267<br>6.67±0.536   | 0.156±0.0416<br>71.3±4.51    | 0.182±0.0556   | 120  |
|                          | Lung      | BDL                          | 0.0432±0.00445<br>21.5±0.315 | BDL | 0.0304±0.00226<br>15.2±0.662   | 0.127±0.0169<br>63.3±0.977   | 0.200±0.0211   | 100  |
|                          | Kidney    | 0.0169±0.00550<br>13.0±0.662 | 0.0380±0.0113<br>29.3±0.651  | BDL | 0.0153±0.00464<br>11.8±0.33    | 0.0591±0.0143<br>46.0±1.64   | 0.145±0.0520   | 89.2 |
|                          | Muscle    | 0.00765±0.00411<br>12.3±7.27 | 0.0133±0.00390<br>21.1±5.80  | BDL | 0.0181±0.00503<br>28.6±5.49    | 0.0237±0.00430<br>38.0±7.21  | 0.0652±0.00971 | 96.2 |

**Table S2** Total As, As species concentrations ( $\mu\text{g/g}$ ) and distribution (%) in As(III) diet, As(V) diet, Fish diet (YJ), Fish diet (ZJ), and Control diet. S1  
Data as mean  $\pm$  SD (n = 10).

| Treatments     | Arsenic species concentrations ( $\mu\text{g/g}$ ) and distribution (%) in diets |                      |                     |                        |                       | Total As ( $\mu\text{g/g}$ )<br>(ICP-MS extract) | Column<br>recovery (%) |
|----------------|----------------------------------------------------------------------------------|----------------------|---------------------|------------------------|-----------------------|--------------------------------------------------|------------------------|
|                | As(III)                                                                          | As(V)                | MMA                 | DMA                    | AsB                   |                                                  |                        |
| Control diet   | 0.00229 $\pm$ 0.000126                                                           | 0.0162 $\pm$ 0.00229 | BDL                 | 0.00101 $\pm$ 0.000166 | 0.00837 $\pm$ 0.00160 | 0.0289 $\pm$ 0.00154                             | 93.1                   |
|                | (8.29 $\pm$ 0.688)                                                               | (58.0 $\pm$ 3.51)    | BDL                 | (3.63 $\pm$ 0.534)     | (30.0 $\pm$ 3.42)     |                                                  |                        |
| As(III) diet   | 0.843 $\pm$ 0.0356                                                               | 0.190 $\pm$ 0.0119   | BDL                 | BDL                    | 0.0387 $\pm$ 0.00154  | 1.09 $\pm$ 0.0611                                | 98.3                   |
|                | (78.6 $\pm$ 1.21)                                                                | (17.8 $\pm$ 1.08)    | BDL                 | BDL                    | (3.64 $\pm$ 0.401)    |                                                  |                        |
| As(V) diet     | 0.0263 $\pm$ 0.000187                                                            | 0.191 $\pm$ 0.0391   | BDL                 | 0.00542 $\pm$ 0.000640 | 0.0626 $\pm$ 0.00714  | 0.301 $\pm$ 0.0213                               | 94.7                   |
|                | (9.29 $\pm$ 1.12)                                                                | (66.6 $\pm$ 5.65)    | BDL                 | (1.94 $\pm$ 0.463)     | (22.2 $\pm$ 4.16)     |                                                  |                        |
| Fish diet (YJ) | 0.00719 $\pm$ 0.000329                                                           | 0.0592 $\pm$ 0.00739 | BDL                 | 0.0133 $\pm$ 0.00109   | 1.36 $\pm$ 0.0405     | 1.44 $\pm$ 0.0486                                | 99.9                   |
|                | (0.497 $\pm$ 0.0760)                                                             | (4.10 $\pm$ 0.370)   | BDL                 | (0.925 $\pm$ 0.105)    | (94.5 $\pm$ 0.342)    |                                                  |                        |
| Fish diet (ZJ) | 0.0317 $\pm$ 0.00368                                                             | 0.0762 $\pm$ 0.00463 | 0.0645 $\pm$ 0.0253 | 0.0287 $\pm$ 0.00510   | 0.950 $\pm$ 0.147     | 1.26 $\pm$ 0.0455                                | 91.4                   |
|                | (2.76 $\pm$ 0.496)                                                               | (6.70 $\pm$ 1.10)    | (5.76 $\pm$ 2.77)   | (2.50 $\pm$ 0.411)     | (82.3 $\pm$ 4.29)     |                                                  |                        |

Values are means  $\pm$  SD (n=10), BDL means below detection limit.
